# Supplementary material
Source: publisher figshare collection journal article supplement (https://acs.figshare.com/ndownloader/files/3707671)
Supplement: Supplementary file 1 [file 3707671]

## SUPPORTING INFORMATION

**Title:** Ion Interaction Models and Measurements of  $\text{Eu}^{3+}$  Complexation: HEDTA in Aqueous Solutions at 25 °C Containing 1:1  $\text{Na}^+$  Salts and Citrate pH Buffer

**Authors:** Simon L. Clegg (s.clegg@uea.ac.uk), and Peter R. Zalupski (peter.zalupski@inl.gov)

**Journal:** Industrial and Engineering Chemistry Research.

**Prepared:** 4 January 2016

This document contains Table S1, and Figures S1 to S3, which are supporting information to the above publication. Table S1 lists the types of solutions measured by Schunk and Maurer (ref. 7 in the paper), and Figures S1 to S3 show model-calculated speciation in various citrate, HEDTA, and  $\text{Eu}^{3+}$ -containing solutions.

**Table S1. Measurements of Osmotic Coefficients Made by Schunk and Maurer.<sup>7</sup>**

| Solution                                         | Compositions                                                                                                                     | Pitzer Model Interactions                                                                                                                                                                                                                                                     | Notes                                                                                           |
|--------------------------------------------------|----------------------------------------------------------------------------------------------------------------------------------|-------------------------------------------------------------------------------------------------------------------------------------------------------------------------------------------------------------------------------------------------------------------------------|-------------------------------------------------------------------------------------------------|
| $\text{Na}_3\text{Citr}$                         | 0.465 to 1.683 mol $\text{kg}^{-1}$                                                                                              | $\beta^0$ , $\beta^1$ , and $C^\phi$ for $\text{Na}^+$ - $\text{Citr}^{3-}$ interactions                                                                                                                                                                                      |                                                                                                 |
| $\text{NaCl} + \text{H}_3\text{Citr}$            | Up to 2.924 mol $\text{kg}^{-1}$ $\text{NaCl}$ , and 5.647 mol $\text{kg}^{-1}$ $\text{H}_3\text{Citr}$                          | $\lambda$ for $\text{NaCl}$ - $\text{H}_3\text{Citr}$ interactions                                                                                                                                                                                                            | The acid dissociates very little in these solutions.                                            |
| $\text{NaNO}_3 + \text{H}_3\text{Citr}$          | Up to 2.906 mol $\text{kg}^{-1}$ $\text{NaNO}_3$ , and 3.861 mol $\text{kg}^{-1}$ $\text{H}_3\text{Citr}$                        | $\lambda$ for $\text{NaNO}_3$ - $\text{H}_3\text{Citr}$ interactions                                                                                                                                                                                                          | The acid dissociates very little in these solutions.                                            |
| $\text{Na}_3\text{Citr} + \text{H}_3\text{Citr}$ | Various ratios, up to 1.670 mol $\text{kg}^{-1}$ $\text{Na}_3\text{Citr}$ and 3.643 mol $\text{kg}^{-1}$ $\text{H}_3\text{Citr}$ | Three pairs of $\beta^0$ , $\beta^1$ , and $C^\phi$ parameters for $\text{Na}^+$ - ( $\text{Citr}^{3-}$ , $\text{HCitr}^{2-}$ , $\text{H}_2\text{Citr}^-$ ) interactions, the self interaction of the aqueous acid ( $\lambda_{n,n}$ ) plus many ternary (mixture) parameters | The compositions of the solutions were chosen so that all of the different species are present. |

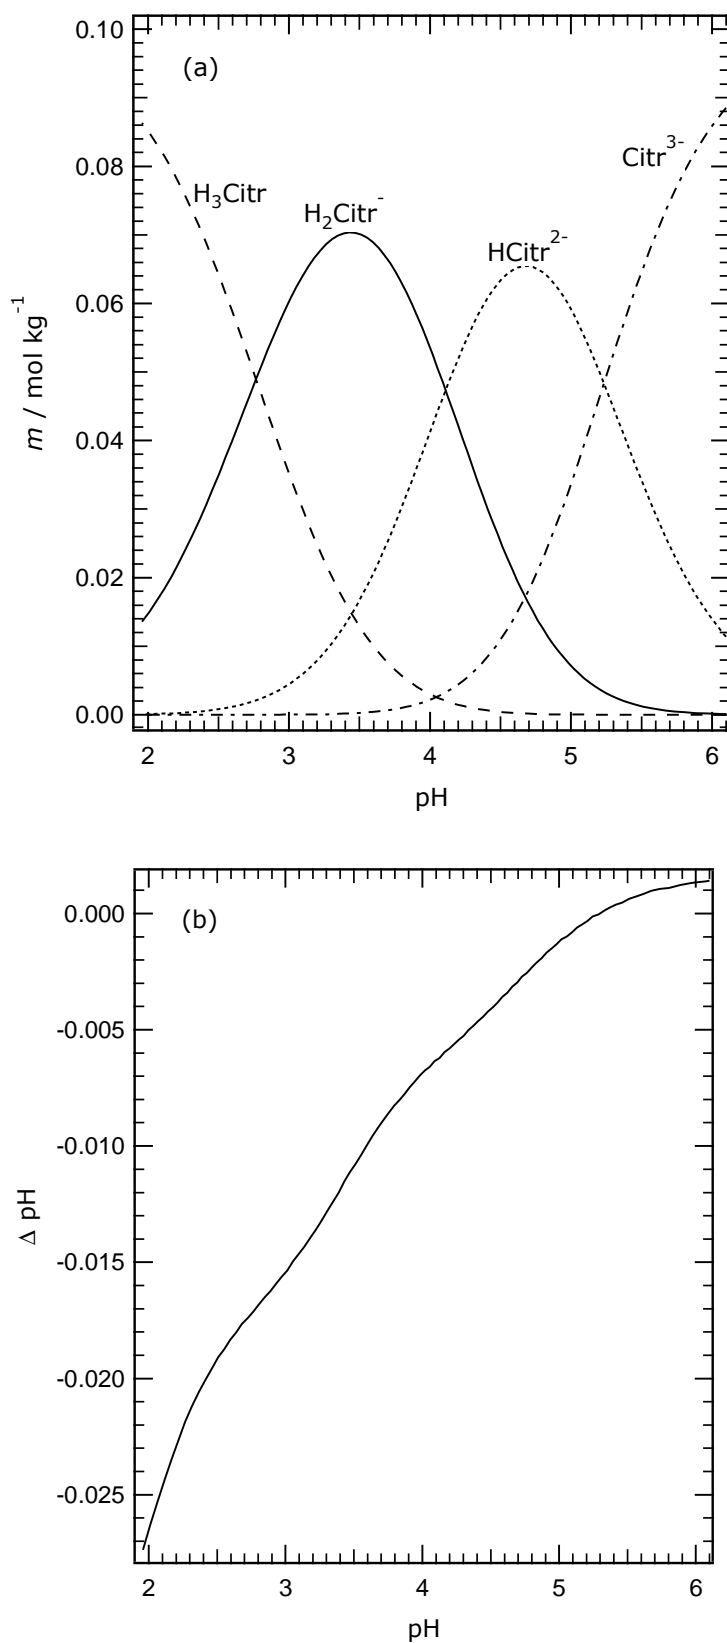

Figure S1. (a) Molalities ( $m$ ) of citrate species in  $1.0 \text{ mol kg}^{-1}$  aqueous  $\text{NaNO}_3$  at  $25^\circ\text{C}$ , as a function of pH, calculated using the Pitzer model developed in this study. The solutions also contain  $0.1 \text{ mol kg}^{-1}$  total citrate, either as  $\text{H}_3\text{Citr}$  (at the lowest pH) or with substitution of some of the acid by  $\text{Na}_3\text{Citr}$  (at higher pH). (b) The effect on the calculated pH of a  $1.0 \text{ mol kg}^{-1}$  aqueous  $\text{NaCl}$  medium instead of aqueous  $\text{NaNO}_3$ . The quantity  $\Delta \text{pH}$  is the difference between the calculated pH in aqueous  $\text{NaCl}$  and that in aqueous  $\text{NaNO}_3$  ( $\text{pH}[\text{NaCl}] - \text{pH}[\text{NaNO}_3]$ ), and it is plotted against the calculated pH in aqueous  $\text{NaNO}_3$ , for which the citrate speciation is shown in panel (a).

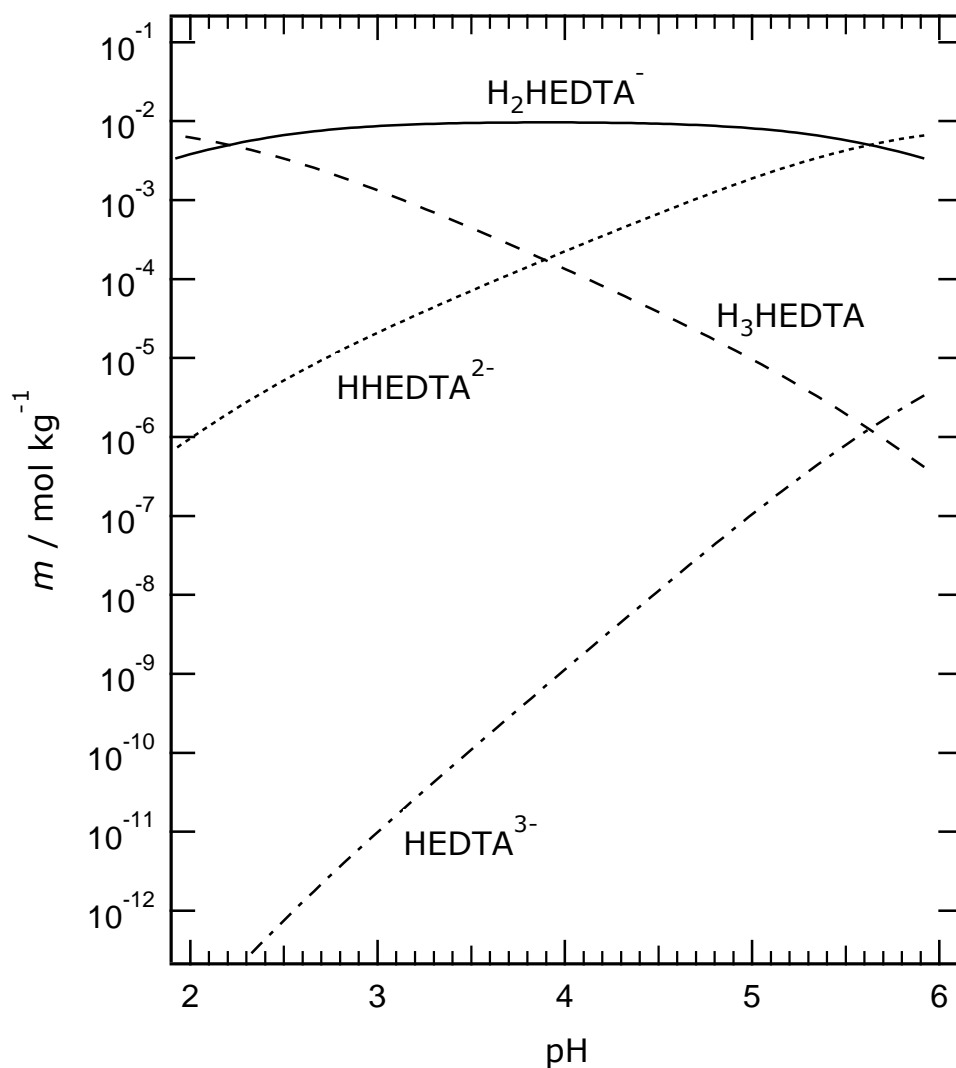

Figure S2. Molalities ( $m$ ) of HEDTA species in 1.0 mol kg $^{-1}$  aqueous NaNO $_3$  at 25 °C, as a function of pH, calculated using the Pitzer model developed in this study. The solutions also contain 0.1 mol kg $^{-1}$  total citrate, either as H $_3$ Citr (at the lowest pH) or with substitution of some of the acid by Na $_3$ Citr (at higher pH), and 0.01 mol kg $^{-1}$  of total HEDTA. The ionic strength of the solutions, calculated from the molalities of the ions, ranges from about 1.02 to 1.57 mol kg $^{-1}$ .

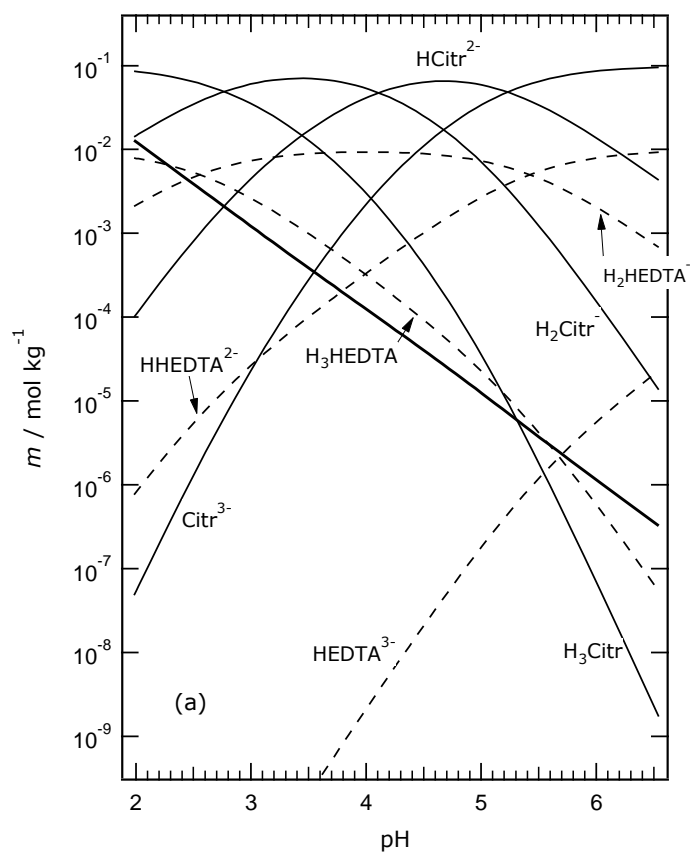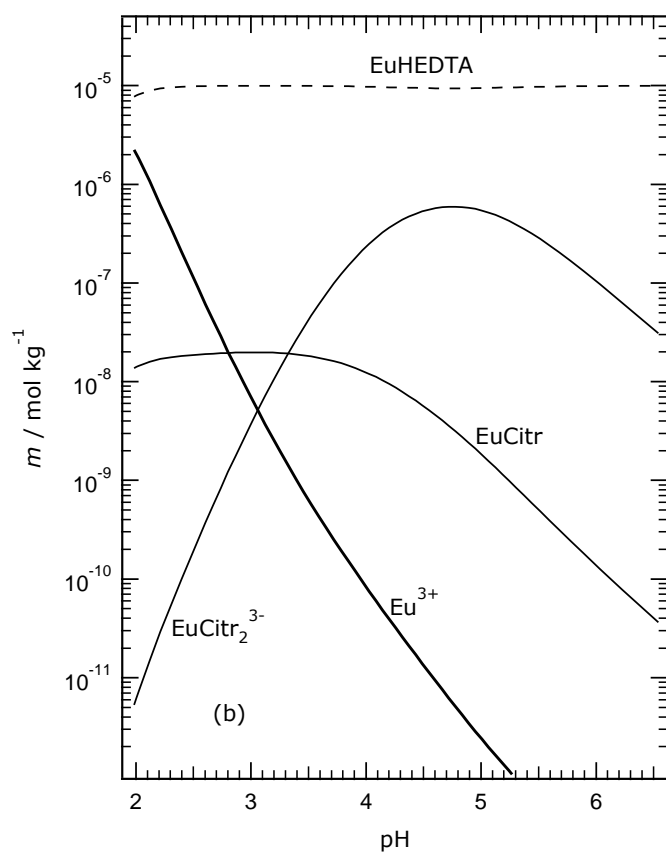

Figure S3. Calculated species molalities ( $m$ ) in a solution containing  $1.0 \text{ mol kg}^{-1} \text{ NaNO}_3$ ,  $0.10 \text{ mol kg}^{-1}$  total citrate,  $0.01 \text{ mol kg}^{-1}$  total HEDTA, and  $1.0 \times 10^{-5} \text{ mol kg}^{-1} \text{ Eu}^{3+}$ , as a function of pH. (a) Acid – base equilibria (citrate and HEDTA speciation). Lines: solid (thick) – free  $\text{H}^+$ ; solid (thin) –  $\text{Citr}^{3-}$ ,  $\text{HCitr}^{2-}$ ,  $\text{H}_2\text{Citr}^-$ , and  $\text{H}_3\text{Citr}$  as indicated; dashed –  $\text{HEDTA}^{3-}$ ,  $\text{HHEDTA}^{2-}$ ,  $\text{H}_2\text{HEDTA}^-$  and  $\text{H}_3\text{HEDTA}$  as indicated. (b) Europium speciation. Lines: solid (thick) – free  $\text{Eu}^{3+}$ ; solid (thin) –  $\text{EuCitr}_2^{3-}$  and  $\text{EuCitr}$ , as indicated; dashed –  $\text{EuHEDTA}$ .
